# Supplementary material
Source: PubMed Central journal article supplement (PMC5728087)
Supplement: NIHMS920362-supplement-Table_S1.pdf [file NIHMS920362-supplement-Table_S1.pdf]

**Supplemental Table 1** Primers for Neurotrophin PCR.

| <b>Name</b>  | <b>3' Primer</b>         | <b>5' Primer</b>         | <b>Size</b> | <b>Gene ID</b> |
|--------------|--------------------------|--------------------------|-------------|----------------|
| NGF          | GCCCACTGGACTAAACTTCAGC   | CCGTGGCTGTGGTCTTATCTC    | 349         | XM_227525      |
| BDNF         | GGTCACAGTCCTGGAGAAAG     | GTCTATCCTTATGAACCGCC     | 214         | NM_012513      |
| NT4/5        | AGCCGGGGAGCAGAGAAG       | ACAAGAGGTCCCACTCAGGA     | 285         | NM_013184      |
| NT3          | GCCTACGAGTTTGTGTTTTTC    | ATGCAGAGCATAAGAGTCAC     | 272         | NM_031073      |
| NTRK1 (TrkA) | AGCACCGAGAGTGATGTGTG     | CAGACTCCTAGCCCAGAACG     | 286         | NM_021589      |
| NTRK2 (TrkB) | GCTTCTGGAGGGCTTCTCTT     | CTTTAAGCCGGAATCCACAA     | 242         | NM_012731      |
| NTRK3 (TrkC) | ACCAGTCACCACTAGCCAAGAATG | CATGGTTCCAGCTCTCTAACACAG | 199         | NM_019248      |
| S2           | CTGCTCCTGTGCCCAAGAAG     | AAGGTGGCCTTGGCAAAGTT     | ~110        | NM_031838      |
